# Supplementary material for: KCTD: A new gene family involved in neurodevelopmental and neuropsychiatric disorders
Source: PubMed Central journal article supplement (PMC6566181; doi:10.1111/cns.13156), 2019-06-14
Supplement: CNS-25-887-s001.pdf [file CNS-25-887-s001.pdf]

>Q719H9\_KCTD1HOMSA  
PAQLTKSNAPVHIDVGGHMYTSSLATLTKYPESRIGRLFDGTEPIVLDSLKQHYFIDRDGQMFRYILNFL  
RTSKLLIPDDFKDYTLLEYEAKYFQLQPMLLEMERWKQDRETG

>Q5M956\_KCTD1MUSMU  
PAQLTKSNAPVHIDVGGHMYTSSLATLTKYPESRIGRLDGTEPIVLDSLKQHYFIDRDGQMFRYILNFLR  
TSKLLIPDDFKDYTLLEYEAKYFQLQPMLLEMERWKQDRETG

>Q5SNS9\_DANRE  
PAQLTKANAPVHIDVGGHMYTSSLATLTKYPESRIGRLFDGTEPIVLDSLKQHYFIDRDGHMFRYILNFL  
RTSKLLIPDDFKDYSLLYEEARYFQLQPLQVELERWRSEQDSR

>Q14681\_KCTD2HOMSA  
RAGGGGAARWVRLNVGGTYFVTTTQTLGREPKSFLCRLCCQEDPELSDKDETGayLIDRDPTYFGPILN  
YLRHGKLIITKELAEEGVLEEAefYNIASLVRLVKERIRDNEN

>Q8CEZ0\_KCTD2MUSMU  
RTSGADGRRRGRPLGPAQRGRYLLRDTRQTLGREPKSFLCRLCCQEDPELSDKDETGayLIDRDPTYFG  
PILNYLRHGKLIITKELGEEGVLEEAefYNIASLVRLVKERIRDNEN

>Q0P490\_DANRE  
PGSRWVRLNVGGTYFVTTKQTLCRDPKSFLYRLCQEDPDLSDKDETGayLIDRDPTYFGPILNYLRHGK  
LIINKNLAEEGVLEEAefYNIASLVRLVKERIRDNEN

>Q9Y597\_KCTD3HOMSA  
MAGGHCGSFPAAAAGSGEIVQLNVGGTRFSTSRQTLMWIPDSFFSLLSGRISTLRDETGAIFIDRDPAA  
FAPILNFLRTKELDLRGVSNVLRHEAEFGITPLVRRLLLCEELERSSCGSVL

>Q8BFX3\_KCTD3MUSMU  
MAGGHCGSFAASAASSGEIVQLNVGGTRFSTSRQTLMWIPDSFFSLLSGRISTLRDETGAIFIDRDPAA  
FAPILNFLRTKELDLRGVSNVLRHEAEFGITPLVRRLLLCEELERSSCGSVL

>F1Q6W0\_DANRE  
MAGTGNSSSTSGMGDIIQLNVGGTRFSTSRQTLTWIPDSFFSLLSGRISTLRDETGAIFIDRDPTAFAPI  
LNFLRTKELDLRGVNISILRHEAEFGITPLVRRLLLCEELERSSCGSVL

>Q8WVF5\_KCTD4HOMSA  
GKNCKSTLMTLNVGGLYITQKQTLTKYPDTFLEGIVNGKILCPFDADGHYFIDRDGLLFRHVLNFLRNG  
ELLLPEGFRENQLLAQEAFFQLKGLAEVKSWEKE

>Q9D7X1\_KCTD4MUSMU  
GKNCKSTLMTLNVGGLYITQKQTLTKYPDTFLEGIVNGKILCPFDADGHYFIDRDGLLFRHVLNFLRNG  
ELLLPEGFRENQLLAQEAFFQLKGLAEVKSWEKE

>Q6GMI6\_DANRE  
SKSFKKPSSGITINVGGYLYAAQRHTLAKHPGSLLEEMVTGKKPVLHVDSMGNTFIDRDGPIFRHILNF  
LRLGELVLPEDFKETELLRREANFYRLSELAQALQDWEQQQ

>Q9TZA6\_CAEEL  
MCSSETIVKLNVGGSVFETWKSTLTKQDGFKTLVETNIPVKKDTSDCYFIDRSPKYFETVLNYMRSGVT  
VLPDSEKELQELKKEAEFYLLLEQLVDLCEPINNQIRTYRSSHELL

>Q9NXV2\_KCTD5HOMSA  
AQRPGSVSKWVRLNVGGTYFLTTRQTLCRDPKSFLYRLCQADPDLSDKDETGayLIDRDPTYFGPVLNY  
LRHGKLVINKDLAEEGVLEEAefYNITSLIKLVKDKIRERDSKTSQVPVK

>Q8VC57\_KCTD5MUSMU  
AQRPGGVSKWVRLNVGGTYFLTTRQTLCRDPKSFLYRLCQADPDLSDKDETGayLIDRDPTYFGPVLNY  
LRHGKLVINKDLAEEGVLEEAefYNITSLIKLVKDKIRERDSRISQMPVK

>Q6NYY3\_DANRE  
APSPGERLQPSGSGSSKWVRLNVGGTYFLTTRQTLCRDPKSFLYRLCQADPDLSDKDETGayLIDRDPT  
YFGPVLNYLRHGKLVLRGLAEEGVLEEAefYNITSLIKLVKDKIRERDCKTAQLPVK

>Q9W579\_DROME  
MSTVFINSRKSPNVLKKQGTDQWVKLNVGTYFLTTKTTLSRDPNSFLSRLIQEDCDLISDRDETGayLI

DRDPKYFAPVLNLYLRHGKLVLDGVSEEGVLEEAEFYNVQTQLIALKCEILHRDQRPQTDKKRVYRVLQCR  
EQELTQM  
>Q18776\_CAEL  
MSSNTDDSTNQNGVAAVKTNQNGFHYGSSSSSWVRLNVGGKVFQTTTRSTLMREPCSFLYRLCQDEMGLPTDR  
DETGAYLIDRDPDFSPILNLYLRHGKLIIMNPLSEEGILAEADFYNLPSLSQLIMDRIQDRENSVKDATN  
KFVYRVLQCHEEELASVV  
>Q8NC69\_KCTD6HOMSA  
YMMTDPVTLNVGGHLYTTSLTTLTRYPDSMLGAMFGGDFPTARDPQGNFYIDRDGPLFRYVNLFLRTSEL  
TLPLDFKEFDLLRKEADFYQIEPLIQCLNDPKPLYPM  
>Q8BNL5\_KCTD6MUSMU  
MDNGDWGYMMSDPVTLNVGGHLYTTSLTTLTRYPDSMLGAMFGGDFPTARDPQGNFYIDRDGPLFRYVNL  
FLRTSELTLPLDFKEFDLLRKEADFYQIEPLIQCLNDPRPLYPM  
>Q6DG99\_DANRE  
MDNGDWGHRLTHPVTLNVGGHLYTTSISTLQRYPDSMLGAMFRGDFPTTRDAQGNFYIDRDGTLFRYILN  
FLRTSELTPVDFTELDLLRKEADFYQIEPLIQCLNDPKPLYPL  
>Q9W2F9\_DROME  
AAASRYTAPVHIDVGGTIYTSSLETLTKYPESKLAKLFNGQIPIVLDLQHYFIDRDGGMFRHILNFMR  
NSRLLIAEDFPDLELLLEEARYYEVEPMIKQLESMRKDRVRNGNYLVAPPTP  
>Q96MP8\_KCTD7HOMSA  
LPLLPQEFPEVVPLNIGGAHFTTRLSTLRCYEDTMLAAMFSGRHYIPTDSEGRYFIDRDGTHFGDVLNFL  
RSGDLPPRERVRVYKEAQYYAIGPLLEQLENMQPLKGEKVRQ  
>Q8BJK1\_KCTD7MUSMU  
LPLLPQEFPEVVPLNIGGAHFTTRLSTLRRYEDTMLAAMFSGRHYIPTDSEGRYFIDRDGTHFGDVLNFL  
RSGDLPPREHVRVAVHKEAQYYAIGPLLEQLENMQPLKGEKVRQ  
>Q0V7V7\_DANRE  
TLDAPEEFPEVIPLNVGGTYFTTRLSTLRRYEDTMLAAMFSGRHHIPRDAEGRYFIDRDGTYFGDILNFL  
REGELPQRDRVRVAVHREAQYYAIGPLLENLEDTQPLTGEKVRQ  
>Q7JZ62\_DROME  
MSESMGDHKILLKGHSSQYLKLNVGGLYTTIGTLTKNNDTMLSAMFSGRMEVLTDSEGWILIDRCGN  
HFGIILNLYLRDGTVPLPETNKEIAELLAEAQYYCITELAI SCERALYAHQEPKICRIPLITSQKEEQLL  
LSVSLKPAVILVVQRQNNKYSYTSSTDDNLLKNIEL  
>Q18986\_CAEL  
MEPSTIVKLDVGGKIFKTTIFTLCKHDSMLKTMFCTDVPVTKNEEGSVFIDRDSKHFRLILNFLRDGQIA  
LPDSDREVREVLAEASYFLDPLIELCGERLEQSLNPPYHLVSTVLEARKIIFATEKPIVLRPLVYIAT  
SGNQSYYFSETK  
>Q6ZWB6\_KCTD8HOMSA  
GPCAPSPFPEVVELNVGGQVYVTKHSTLLSVPDSTLASMFSPPSSPRGGARRRGELPRDSRARFFIDRDGF  
LFRYVLDYLRDKQLALPEHFPEKERLLREAQYFQTLDLVKLLSPKVTKQNS  
>Q50H33\_KCTD8MUSMU  
GPCAPSPFPEVVELNVGGQVYVTKHSTLLSVPDSTLASMFSPPSSPRGGARRRGDLPRDSRARFFIDRDGF  
LFRYVLDYLRDKQLALPEHFPEKERLLREAQYFQTLDLVKLLSPKVTKQNS  
>Q3L1G3\_DANRE  
MAMKETILPISEVSSPYPEVVELNVGGQVYVTKRSTLVSVPTTLHTMFTRCTPHELPRDSRGRFFIDRD  
GFLFRYVLDLDRQLVLPPEHFERERLQREAEHFQLGELLRLLGPRVAKQGS  
>A0PD34\_CAEL  
MCAVPFLGASIIYILPNRAYYMTSVEDVITLVGGTMYTTTRSTLSKETDTLLANIASGSLSEDEQANV  
VTLPDGTFLVDRDGPLFAYVLHFLRTDKLSLPEQFREVARLKDEADFYRLERFSTLLSNASSISPRPRTA  
NGYNTITSGAETGGYITLGYRGT  
>Q7L273\_KCTD9HOMSA  
PEGLLGFTDWTLVNVGGRYFTTTRSTLVNKEPDSMLAHMFKDKGVWGNKQDHRGAFLIDRSPEYFEPIL

NYLRHGQLIVNDGINLLGVLEEARFFGIDSLIEHLEVAIKNSQPPEDHSPIS  
>Q80UN1\_KCTD9MUSMU  
PGGLLSHTDWTNLVGGRYFTTTRSTLVNKEPDSMLAHMFKDKGVWGNKQDHRGAFLIDRSPEYFEPIL  
NYLRHGQLIVNDGINLLGVLEEARFFGIDSLIEHLEVAIKNSQPPEDHSPIS  
>Q6DGD4\_DANRE  
KGGLIDDIALIRDDVLYISEGDSFVDPNPNPESVHEFNWAHTDWITLNVGGRRFTTTRSTLVKETESM  
LAHMFrdKdVWGNKQDEQGAYLIDRSPDYFEPILNYLRHGQLIINDGINLLGVLEEARFFGIERLAEQLE  
GVIKNSQPPDDHSPIS  
>F1Q5M1\_DANRE  
KGGLIDDIALIRDDVLYVSEGDAFIDPHSEGKMSDDISGSHTDWTNLNIGGRLFTTTRSTLVSKPEPDSM  
LAHMFREKdVWGNKQDERGAFLIDRSPEYFEPILNYLRHGQIIINDGINLLGVLEEARFFGIEQLAEQLE  
VAIKNSHPPEDHSPLS  
>Q8T0F7\_DROME  
MTGEEREDKAAENCQALWKFfKLPNQMSDLKESGSGARKDDAAPAAGDFVAASGFAPNRWVWKLNVGGQI  
YATTIDTLVGREPDSMLARMFLQNGSMKPSERDEQGAYLIDRSPRYFEPINYLNRHGQFVCDNISVLGV  
LEEARFFGIFSLVTHLEERLGGQETPLGDRPLT  
>Q9H3F6\_KCTD10HOMSA  
MEEMSGESVSSAVPAAATRRTTSFKGTSPSSKYVKNLVGGALYYTTMQTLTKQDTMLKAMFSGRMEVLT  
SEGWILIDRCGKHFGTILNYLRDGVPLPESRREIEELLAEAKYYLVQGLVEECQAALQNKDTYPEPFCKV  
PVITSSKEEQKL  
>Q922M3\_KCTD10MUSMU  
MEEMSGDSVSSAVPAAATRRTTSFKGASPSSKYVKNLVGGALYYTTMQTLTKQDTMLKAMFSGRMEVLT  
SEGWILIDRCGKHFGTILNYLRDGGVPLPESRREIEELLAEAKYYLVQGLLEECQAALQNKDTYPEPFCKV  
PVITSSKEEQRL  
>Q6P7X5\_DANRE  
MEEMSGESVSSAVPAAATRRTTSFKGSSPSSKYVKNLVGGALYYTTMQTLTKQDTMLKAMFSGRMEVLT  
SEGWILIDRCGKHFGTILNYLRDGVVPLPESRRETEELLAEAKYYLVQGLVDECQAALQNKDAYEPFCKV  
PLVTSSKEEQRL  
>Q693B1\_KCTD11HOMSA  
ISPPVPSSPPSFGGPVTLNVGGTLYSTTLETLTRFPDSMLGAMFRAGTPMPPNLSQGGGHYFIDRDGK  
AFRHILNFLRLGRLDLPRGYGETALLRAEADFYQIRPLLDALRELEASQGTAPTAALLHADVDVSPRLV  
HFSARRGPHHYELSSVQVDTFRAN  
>Q8K485\_KCTD11MUSMU  
TLPPNSFQTPKYLLFPSPCLSLILPKISPPPVSLLPPSFGGPVTLNVGGTLYSTTLETLTRFPDSMLGAM  
FRADTLMPANLNPQGDGHYFIDRDGKAFRHILNFLRLGRLDLPRGYGETALLKAEADFYQIRPLLDALRE  
LEASRGTPASTAALLHADVDVSPRQVHFSARRGPHHYELSSVQVDTFRAN  
>Q96CX2\_KCTD12HOMSA  
MALADSTRGLPNGGGGGGGSGSSSSSAEPPLFPDIVELNVGGQVYVTRRCTVVSVPDSSLWRMFTQQQPQ  
ELARDSKGRFFLDRDGFLFRYILDYLRDLQLVLPDYFPERSRLQREAEYFELPELVRRLGAPQPGPGPP  
PSRRGVHKEG  
>Q6WVG3\_KCTD12MUSMU  
MALADSARGLPNGGGGGGGSGSSSSSAEPPLFPDIVELNVGGQVYVTRRCTVVSVPDSSLWRMFTQQQPQ  
ELARDSKGRFFLDRDGFFFYILDYLRDLQLVLPDYFPERSRLQREAEYFELPELVRRLGAPQPGPGPP  
PPHSRRGVHKEG  
>Q804Q4\_DANRE  
MALADPECGISNGADSASPFSVIIELNVGGQVYVTRHTTLIAVPDSSLWNMFSKKTPAELARDSKGRFFL  
DRDGFLFRYILDYLRDLNLVLPDYFPEKSRLQREAEFFQLRDLKLLSPKMSKDNSITDEICQSDSEEPS  
ASATPVVGPETSRTLSVASSAHSPSLESRSKSGYITVGYRGSYTMG  
>Q561T3\_DANRE  
MDKTRADASSPRFSEIIELNVGGQVYVTRHSTLLSVPNSLLWTMFSQKPAELTTDSKGRFFLDRDGFLF

RYILDYLRDQTLVLPDYFKEKASLLKEAEYFQLQDLAKRLKPAVSKENSISEEVCQSDPEEAALAGTSMT  
CTGPRSPSLDARKTGFIITIGYRGSYITIG  
>Q9VDH3\_DROME  
MPEIIELNVGGVSYTTTLATLLQDKSTLLAELFGEGRDSLAKDSKGRYFLDRDGVLFYIILDFLRDKALH  
LPEGFRERQRLREAHEFKLTAMLECI R SERDARPPGCITIGYRGSFQFGKDGLADV KFRKLSRILVCGR  
>Q8WZ19\_KCTD13HOMSA  
MSAEASGPAAAAAPSLEAPKPSGLEPGPAAYGLKPLTPNSKYVKLVN VGGSLHYTTLR TLTGQDTMLKAMF  
SGRVEVLT DAGGWV LIDRSGRHFGTILNYLRDGSVPLPESTREL GELLGEARYYL VQGLIEDCQLALQQK  
RETLSPLCLIPMVTSPREEQQ  
>Q8BGV7\_KCTD13MUSMU  
MSAEASGPAPAAAECLESPSPSSVEPGSPSYSLKPLTPNSKYVKLVN VGGSLHYTTLR TLTGQDTMLKAMF  
SGRVEVLT DAGGWV LIDRSGRHFGTILNYLRDGSVPLPE SAREL GELLGEARYYL VQGLIEDCQLALQQK  
REKLSPLCLIPTVTSPREEQQ  
>A9ULR9\_DANRE  
MSAEASGSSGGHAVTVSGSSPSSSHVGE EK PGRSLVSSKYVKLVN VGGTLHYTTVQTL SKEDSLLRSICD  
GSTEVSIDSEGWVLDRCGRHFSVLNFLRDGT VPLPDSTRELEEV LKEAQYYRLQGLVQHCLSTLQKRR  
DVCRGCHIPMITSAKEEQR  
>Q9BQ13\_KCTD14HOMSA  
MWQGC AVERPVGRMTSQTPLPQSPRRRPTMSTVVELNVGGEFHTTTLGTLRKFP GSKLAEMFSSLAKAS  
TDAEGRFFIDRPSTYFRPILDYLR TQVPTQH IPEVYRE AQFYEIKPLVKLLEDMPQIFGEQVSRKQFLL  
QVPGYSENLE  
>Q5EER8\_KCTD14MUSMU  
MSSWAKVIYGASTE L DAKVVELNVGGQFYTTT MGTLMKHPGSKFSEILSRSARHYKDAQGRFFIDRP GTY  
FGLLLDYLR TQVPT EYVPEVYQEAKFYQIHL LVKILEDM PQIFGEQVARTQFLMGV PNYRENLE  
>A0A2R8RRJ7\_DANRE  
MSLPDYKTIGKQSSAPVQSKSQVHLNIGGHV FSTTLGTIRKFPNSTLAELINGSSKRMDSEGRYFIDRD  
GTLFTHILEYLRTEKLPCEHLQEVHKEAIYYDIKPLVKAIEETPQFFGETVGRQQFLARVP NYRENLE  
>Q96SI1\_KCTD15HOMSA  
QGIPLPAQLTKSNAPVHIDVGGHMYTSSLATLTKYPDSRISRLFNGTEPIVLD SLKQHYFIDRDGEIFRY  
VLSFLRTSKLLL PDDFKDF SLLYEEARYYQLQPMVRELERWQQEQEQRRRSRACDCLVVRV  
>Q8K0E1\_KCTD15MUSMU  
QGIPLPAQLTKANAPVHIDVGGHMYTSSLATLTKYPDSRISRLFNGTEPIVLD SLKQHYFIDRDGEIFRY  
ILSFLRTSKLLL PDDFKDFNLLYEEARYYQLQPMVRELERWQQDQEQRRRSRACDCLVVRVTPDLGER  
>Q6DC02\_DANRE  
QGIPLPAQLTKANAPVHIDVGGHMYTSSLATLTKYPDSRISRLFNGTEPIVLD SLKQHYFIDRDGEIFRY  
ILSFLRTCKLLL PDDFKDFNLLYEEARYYQLSPMIKELERWKQEREQRRLANPCDCLVVRVTPDLGER  
>Q68DU8\_KCTD16HOMSA  
PREQGS AVPN SFPEVVELNVGGQVYFTRHSTLISIPH SLLWKMFSPKRDTANDLAKDSKGRFFIDRDGFL  
FRYILDYLRDRQVVL PDHFPEKGRLKREAEYFQLPDLVKLLTPDEIKQSPDEFCH  
>Q5DTY9\_KCTD16MUSMU  
PRDQGA AVPN SFPEVIELNVGGQVYFTRHSTLISIPH SLLWKMFSPKRDTANDLAKDSKGRFFIDRDGFL  
FRYILDYLRDRQVVL PDHFPERGRLKREAEYFQLPDLVKLLAPEDVKQSPDEFCH  
>Q3L1G6\_DANRE  
PKDSGCAQSCSSDVVELNVGGQVYYTRHATLTSVPNSLLGKLFSSKKDISNDLTQDIKGRYFIDRDGFLF  
RYVLDYLRDKTVVLPDYFPEKGRLKREAEFFQLPELVKILTPDDYSHS  
>Q3L1G4\_DANRE  
MALSGNSKPKDSSFPDVIELNVGGQVYYTRYTTLINTPGSLLGKIFSPKNNASNDLARDPKGRYFIDRDG  
FLFRYVLDYLRDKQVVL PDHFPEKGRLKREAEYFQLPDLVKLLTPDDLKPSSEYIH  
>Q8N5Z5\_KCTD17HOMSA  
PAGAGGRAAGGWGKWRVLRNVGGTVFLTTRQTL CREQKSFLSRLCQGEELQSDRDET GAYLIDRDPTYFGP

ILNFLRHGKLVLDKDMAEEGVLEEAFFYNIGPLIRIIKDRMEEKDYTVTQVPPKHVYRV  
>A6H697\_KCTD17MUSMU  
PVGAGGRPGGGWGKWRVRLNVGGTVFLTTRQTLCREQKSFLSRLCQGEELQSDRDETGAYLIDRDPTYFGP  
ILNFLRHGKLVLDKDMAEEGVLEEAFFYNIGPLIRIIKDRMEEKDYTVAVQVPPKHVYRV  
>U3JA92\_DANRE  
DNEGSEGATTTSTDVESTGAENIIGNSAVNTTGGNNGKWRVRLNVGGTVFLTTRQTLLEQTSFLYRLC  
QQQDLHSDTDETAYVIDRDPTYFGPILNYLRHGKLVYNKELAEEGVLEEAFFYNITPLIKLIKERILER  
DSKATQVPPKHVYRV  
>Q6PI47\_KCTD18HOMSA  
MEGHKAEVEVLDVLRNLVGGCIYTARRESLCRFKDSMLASMFSGRFPLKTDESGACVIDRDGRLFKYLLD  
YLHGEVQIPTDEQTRIALQEEADYFGIPYPYSLSDHLANEMET  
>Q6DI85\_KCTD18MUSMU  
MAGHEAEDVLDILRLNVGGCIYTARRESLCRFKDSMLASMFSGRFPLKTDESGACIINRDGHLFKYILDY  
LHGEVQTPSDEQTRALQEEADYFGIPYPYSLSDHLANEMETYSRLR  
>Q17RG1\_KCTD19HOMSA  
WTAETVYSPQIIKVVYVGSWHYATTLQTLKYPELLSNPQRVYWIYTGQTLIIHGQGQMFHILNFLRL  
GKFLPSEFKWPLFCQEEVEEYHIPSLSEALAQCEAYKSWTQEKESENE  
>Q562E2\_KCTD19MUSMU  
WTAETVYSPQIIKLYVGSWHYATTLQTLKYPELLSNTQRVYWIAYGQTLIIHGQGQMFHILNFLRL  
GKFLPSEFKWPLFCQEEVEEYHIPALSEALAQCEAYKSWTQEKESENEEAFPIRKLHVTEGTGP  
>Q7Z5Y7\_KCTD20HOMSA  
SVGFSGNSHSAPEKVTLLVDGTRFVNPQIFTAHPDTMLGRMFGPGREYNFTRPNEKGEYEIAEGISAT  
VFRTVLDYKGTGIINCPDGISIPDLRDTCDYLCINFDNFNTIRCQDLSAL  
>Q8CDD8\_KCTD20MUSMU  
SHEPFIVPERFGNSGLGFGGGAHSQAPEKVTLLVDGTRFVNPQIFTAHPDTMLGRMFGPGREYNFTRPN  
EKGEYVIAEGISATVFRTVLDYKGTGIINCPDGISIPDLRDTCDYLCINFDNFNTIRCQDLSAL  
>A0A2R8QE47\_DANRE  
PRPLSHDRVTLVVDGTHFVVDPAVFTAYPDTVLGRMFGRARQHSFTRPNTKGEYEIAEGIGASIFRIILD  
FYRVGILHCPEGVSLAELREACDYLCINFDYNTVRCRDLALLHEL  
>X2J8G3\_DROME  
MSGGAVPKHDIKSPCGASPSCQATGSGMGRPLPPERITMLVDGVRFTVEQSLLTAHPTTMLGTMFGSG  
FQFAHTNERGEYDVADGISHLVFRAILEYYKSGVIRCPPTVSVPELKEACDYLLIPFDATTVRCQNL  
>Q21748\_CAEEL  
EGDKVCLLVDQTRFLVSQRLLTSKPDTMLGRMFSMRASCGDLGADLVSPNERDEFEVADGMTSSCFRIL  
DYYQSGTMRCSSVSVSELREACDYLLVPFNAQTVKCNLHALLHEL  
>Q4G0X4\_KCTD21HOMSA  
MSDPITLNVGGKLYTTSLATLTSFPDSMLGAMFSGKMPTKRDSQGNCFIDRDGKVFYILNFLRTSHLDL  
PEDFQEMGLLRREADFYQVQPLIEALQEKEVELSKAEKNAMLNI  
>Q3URF8\_KCTD21MUSMU  
MSDPITLNVGGKLYTTSLATLTSFPDSMLGAMFSGKMPTKRDSQGNCFIDRDGKVFYILNFLRTSHLDL  
PEDFQEMGLLRREADFYQVQPLIEALQEKEVELSKAEKNAMLNI  
>Q8TBC3\_SHKB1HOMSA  
MAAATAAEGVPSRGPPEVIHLNVGGKRFSTSRQTLTWIPDSFFSLLSGRISTLKDETGAIFIDRDPT  
VFAPILNFLRTKELDPRGVHGSSLLHEAQFYGLTPLVRRQLREELDRSSCGNVLFNGLYLPVFPVKRR  
NRHSLVGPQQ  
>Q6P7W2\_SHKB1MUSMU  
MAVATTAVEGVP SRGAPGEVIHLNVGGKRFSTSRQTLTWIPDSFFSLLSGRISTLKDETGAIFIDRDPT  
VFAPILNFLRTKELDPRGVHGSSLLHEAQFYGLTPLVRRQLVREELDRSSCGNVLFNGLYLPVFPVKRR  
NRHSLVGPQQ  
>E7FFI2\_DANRE

MARIGDIIHLNVGGKRFSTSRQTLTWPDSEFFSLLSGRISTLKDETGAI FIDRDP SLFAPILN FLRTKE  
LHPRSIDVHLLIHEAEFYGITPLVRKLQLCDELDRSSCGNVLFNGYLP PPVYPVKRRNRHSVAGPQF  
>Q9VH62\_DROME  
MSHFTHASSSDLVNLNVGGQRFSTSRQTLTWIPDTFFTALLSGRISSLRDEHNAIFIDRDPTLFSIILNY  
LRTKDIDIKNCEIRALRHEAEYGITPLTKRLALCEDLNHSSCGDLLFYGFLAAPPMP SNEAVAATSVDE  
SLPSTSASAIGSRPGSMVRVPEPSRSSHSRNSSWD  
>017001\_CAEEL  
MAHQPCSSSSFSNDSGSDYIVNLNVGGRI FATSCNTLTWIPDSEFFSLLSGRMNSVKDPSGAI FIDRDPD  
LFRVILNYLRTKQVDLCGIKVDTLKHEALFFGLTPLIRRLTLCEELSSTSCGSVYFCGMIPPPDMPL ENL  
PNEKSRSPMYSNSSETSTNNSKNKSNKSGSPRHRGH SKKQSTDM SRYIKNEL  
>Q13829\_TNFAIP1HOMSA BACD2HOMSA  
MSGDTCLCPASGAKPKLSGFKGGGLGNKYVQLNVGGS LYTTVRALTRHDTMLKAMFSGRMEVLT DKEGW  
ILIDRCGKHFGTILNLYLRDDTITLPQNRQEIKELMAEAKYYLIQGLVNMCSALQDKKDSYQ PVCNIPII  
TSLKEEERLI  
>070479\_TNFAIP1MUSMU BACD2MUSMU  
MSGDTCLCPASGAKPKISGFKGGGLGNKYVQLNVGGS LYTTVRALTRHDTMLKAMFSGRMEVLT DKEGW  
ILIDRCGKHFGTILNLYLRDDTITLPQSRQEIQELMAEAKYYLIQGLVSTCQTALQDKKDSYQ PVCNIPII  
TSLREEDRLI  
>F1R5K5\_DANRE  
MSGESCLHQLQPHTGPILPVSSVGC PKTNTCTYRGVTGNKYVQLNVGGNLYYSTLQVLTRQDTLLRSMFS  
GKMEVLT DKEGWILIDRCGKHFGSILSYLRDGFVNLPKSRQSIMELLAEAKYYQIQGLIDLCQKELQDNK  
EKALCVIPVITSPKEEERLI  
>P12611\_WHI2SACCE  
QNSQYEGNEEDYGD SLIHLNIQENHYFITRDQLMSLPESLLLCLFP SGVFLDRCGQVITNLTRDDEVYIV  
NFPPDCFEYIMEIYTKAHD DLYNHPVEKFFDRPSSSFVSNAGFFGLSSNNSISSNNEQDILHQKPAIIV  
LREDLDYYCVPQEEFQFDSTNEENNEDLLRH FMAQVKMAA  
>Q9P7D3\_WHI2SACPO  
MSVITQAQEIPTVAANPDFNYEGDPIIIQLCDRDTVFELSRDQLLGLPESILMCLFPRGLLLDYEIQEQ  
LTQRPLIFQTADFP SLLQYILNYFQMAENRTANDEIALSPPPPSFPGKCGIILLKEDI EFFILPPI SPT  
TNIAIEVSPNDLLK LKQ RVAQRLLQKK  
>A0A1D8PQP1\_WHI2CANAL  
MSTSTSSQQPQDIITQVSPHQQDSFN TTTTHTTGTDDQSDVGGG DYNSIIHLNIRGKEFTITRDDL M  
SLPESILLCLFPNGVFLDVNGVINNLTEDDIVYVNFDPQTFQYIINTFYQAQQDLIQMSTNTT NLTPVT  
SHNNGRHNNNNNSSSRHN RQENILETKPAIIVLREDLDFYVIPP FERLNSEQMKQLKLGVSIQLLKNKL  
>Q2TUM3\_KCNRG\_MUSMU  
GQDLVTLNVGGRI FTTRPSTLQFPASRLAGMLDGRDQEFKTVDGQIFVDRD GALFSFILD FLRNHELLL  
PSDFADHHLRQREALFYELDSLVDLLSQFLLQSRS AVME  
>Q8N5I3\_KCNRG\_HOMSA  
SQELVTLNVGGKIF TTRFSTIKQFPASRLARMLDGRDQEFK MVGGQIFVDRDGD LFSFILD FLRTHQLLL  
PTEFSDYLRLQREALFYELRSLVDLLNPYLLQPRPALVE  
>Q9BSF8\_BTBD AHOMSA  
TSERVTLIVDNTRFVVDPSIFTAQPNTMLGRMFGSGREHN FTRPNEKGEYEVAEGIGSTVFRAILDYYKT  
GIIRCPDGISIPELREACDYLCISFEYSTIKCRDLSALMHEL  
>Q80X66\_BTBDAMUSMU  
TSERVTLIVDNTRFVVDPSIFTAQPNTMLGRMFGSGREHN FTRPNEKGEYEVAEGIGSTVFRAILDYYKT  
GIIRCPDGISIPELREACDYLCISFEYSTIKCRDLSALMHEL  
>A4IG48\_DANRE  
TAERVTLIVDNTRFVVDPSIFTAQPNTMLGRMFGSGREHN FTRPNEKGEYEVAEGISSTVFRAILDYYKS  
GIIRCPDGISIPELREACDYLCIAFDYSTIKCRDLSALMHEL  
>X1WDG9\_DANRE

TSEKVTLIVDNTRFVVDPSIFTAQPNTMLGRMFGSGREHNFTRPNEKGEYEVAEGISSTVFRAILDYYKS  
GIIRCPDGISIPELREACYLCISFDYSTIKCRDLSALMHEL
