# Supplementary material for: KCTD: A new gene family involved in neurodevelopmental and neuropsychiatric disorders
Source: PubMed Central journal article supplement (PMC6566181; doi:10.1111/cns.13156), 2019-06-14
Supplement: CNS-25-887-s002.pdf [file CNS-25-887-s002.pdf]

CLUSTAL W (1.7) multiple sequence alignment

```

KCTD1_HOMSA      SNAPVHIDVGGHMYTSSLATLT-KYPESRIGRLFDGTEPIVL-----
DSLKQHYFID
KCTD1_MUSMU      SNAPVHIDVGGHMYTSSLATLT-KYPESRIGRL-DGTEPIVL-----
DSLKQHYFID
Q5SNS9_DANRE     ANAPVHIDVGGHMYTSSLATLT-KYPESRIGRLFDGTEPIVL-----
DSLKQHYFID
KCTD15_HOMSA     SNAPVHIDVGGHMYTSSLATLT-KYPDSRISRLFNGTEPIVL-----
DSLKQHYFID
KCTD15_MUSMU     ANAPVHIDVGGHMYTSSLATLT-KYPDSRISRLFNGTEPIVL-----
DSLKQHYFID
Q6DC02_DANRE     ANAPVHIDVGGHMYTSSLATLT-KYPDSRISRLFNGTEPIVL-----
DSLKQHYFID
Q9W2F9_DROME     YTAPVHIDVGGTIYTSSLETLT-KYPESKLAKLFNGQIPIVL-----
DSLKQHYFID
KCTD6_HOMSA      MTDPVTLNVGGHLYTTSLTTLT-RYPDSMLGAMFGGDFPTA-----
RDPQGNFYFID
KCTD6_MUSMU      MSDPVTLNVGGHLYTTSLTTLT-RYPDSMLGAMFGGDFPTA-----
RDPQGNFYFID
Q6DG99_DANRE     LTHPVTLNVGGHLYTTSISTLQ-RYPDSMLGAMFRGDFPTT-----
RDAQGNFYFID
KCTD21_HOMSA     MSDPITLNVGGKLYTTSLATLT-SFPDSMLGAMFSGKMPTK-----
RDSQGNCFYFID
KCTD21_MUSMU     MSDPITLNVGGKLYTTSLATLT-SFPDSMLGAMFSGKMPTK-----
RDSQGNCFYFID
KCTD11_HOMSA     FGGPVTLNVGGTLYSTTLETLT-RFPDSMLGAMFRAGTPMP-----
PNLNSQGGGHYFID
KCTD11_MUSMU     FGGPVTLNVGGTLYSTTLETLT-RFPDSMLGAMFRADTLMP-----
ANLNPQGDGHYFID
KCTD4_HOMSA      KSTLMTLNVGGYLYITQKQTLT-KYPDTFLEGIVNGKILCP-----
FDADGHYFID
KCTD4_MUSMU      KSTLMTLNVGGYLYITQKQTLT-KYPDTFLEGIVNGKILCP-----
FDADGHYFID
Q6GMI6_DANRE     SSGTITINVGGYLYAAQRHTLA-KHPGSLLEEMVTGKKPV-----
LHVDSMGNTFYFID
KCTD8_HOMSA      FPEVVELNVGGQVYVTKHSTLL-
SVPDSTLASMFPSSPRGGARRRGELPRDSRARFFID
KCTD8_MUSMU      FPEVVELNVGGQVYVTKHSTLL-
SVPDSTLASMFPSSPRGGARRRGDLPRDSRARFFID
Q3L1G3_DANRE     YPEVVELNVGGQVYVTKRSTLV-SVPDTTLHTMFTRCTP-----
HELPRDSRGRFFID
KCTD16_HOMSA     FPEVVELNVGGQVYFTRHSTLI-SIPHSLLWKMFSPKRDT-----
ANDLAKDSKGRFFID
KCTD16_MUSMU     FPEVIELNVGGQVYFTRHSTLI-SIPHSLLWKMFSPKRDT-----
ANDLAKDSKGRFFID
Q3L1G4_DANRE     FPDVIELNVGGQVYYTRYTTLI-NTPGSLLGKIFSPKNNA-----
SNDLARDPKGRYFID
Q3L1G6_DANRE     SSDVVELNVGGQVYYTRHATLT-SVPNSLLGKLFSSKKDI-----

```

|                  |                                                |
|------------------|------------------------------------------------|
| SNDLTQDIKGRYFID  | FSVIELNVGGQVYVTRHTTLI-AVPDSLLWNMFSKKT-----     |
| Q804Q4_DANRE     | FSEIELNVGGQVYVTRHSTLL-SVPNSLLWTMFSQKKP-----    |
| AELARDSKGRFFLD   | GQDLVTLNVGGRIFTTRPSTLK-QFPASRLAGMLDGRDQ-----   |
| Q561T3_DANRE     | SQELVTLNVGGKIFTTRFSTIK-QFPASRLARMLDGRDQ-----   |
| AELTTDSKGRFFLD   | FPDIVELNVGGQVYVTRRCTVV-SVPDSLLWRMFTQQP-----    |
| KCNRG_MUSMU      | FPDIVELNVGGQVYVTRRCTVV-SVPDSLLWRMFTQQP-----    |
| EFKTVDGQIFVD     | MPEIIELVGGVSYTTTLATLL-QDKSTLLAELFGEGR-----     |
| KCNRG_HOMSA      | VEDVITLVGGTMYTTTRSTLS-KETDTLLANIASGSLSEDE----  |
| EKMVGGQIFVD      | FPEVVPLNIGGAHFTTRLSTLR-CYEDTMLAAMFSGRHYIP----- |
| KCTD12_HOMSA     | FPEVVPLNIGGAHFTTRLSTLR-RYEDTMLAAMFSGRHYIP----- |
| QELARDSKGRFFLD   | FPEVIPLNVGGTYFTTRLSTLR-RYEDTMLAAMFSGRHHIP----- |
| KCTD12_MUSMU     | MSTVVELNVGGEFHTTTLGTLR-KFPGSKLAEMFSSLAKAS----- |
| QELARDSKGRFFLD   | DAKVVELNVGGQFYTTTMTGLM-KHPGSKFSEILSRSARHY----- |
| Q9VDH3_DROME     | KSQVVHLNIGGHVFSTTLGTIR-KFPNSTLAELINGSSKR-----  |
| DSLAKDSKGRYFLD   | AARWVRLNVGGTYFVTTRQTLG-REPKSFLCRLCCQEDPE-----  |
| A0PD34_CAEL      | GSRWVRLNVGGTYFVTTKQTLR-RDPKSFLYRLC-QEDPD-----  |
| QANVVTLPDGTLFVD  | VSKWVRLNVGGTYFLTTRQTLR-RDPKSFLYRLC-QADPD-----  |
| KCTD7_HOMSA      | VSKWVRLNVGGTYFLTTRQTLR-RDPKSFLYRLC-QADPD-----  |
| TDSEGRYFID       | VSKWVRLNVGGTYFLTTRQTLR-RDPKSFLYRLC-QADPD-----  |
| KCTD7_MUSMU      | SSKWVRLNVGGTYFLTTRQTLR-RDPKSFLYRLC-QADPD-----  |
| TDSEGRYFID       | GRPLGPAQRGRYLLRDTRQTLG-REPKSFLCRLCCQEDPE-----  |
| Q0FV7_DANRE      | WGKWVRLNVGGTVFLTTRQTLR-REQKSFLSRLCQGEE-----    |
| RDAEGRYFID       | WGKWVRLNVGGTVFLTTRQTLR-REQKSFLSRLCQGEE-----    |
| KCTD14_HOMSA     | NGKWVRLNVGGTVFLTTRQTLR-KEQTSFLYRLCQQQD-----    |
| TDAEGRFFID       | SSSWVRLNVGGKVFQTTTRSTLM-REPCSFLYRLCQ-DEMG----- |
| KCTD14_MUSMU     | TDQWVRLNVGGTYFLTTKTLLS-RDPNSFLSRLIQ-EDCD-----  |
| KDAQGRFFID       |                                                |
| A0A2R8RRJ7_DANRE |                                                |
| MDSEGRYFID       |                                                |
| KCTD2_HOMSA      |                                                |
| LDSDKDETAYLID    |                                                |
| Q0P490_DANRE     |                                                |
| LDSDKDETAYLID    |                                                |
| KCTD5_HOMSA      |                                                |
| LDSDKDETAYLID    |                                                |
| KCTD5_MUSMU      |                                                |
| LDSDKDETAYLID    |                                                |
| Q6NYY3_DANRE     |                                                |
| LDSDKDETAYLID    |                                                |
| KCTD2_MUSMU      |                                                |
| LDSDKDETAYLID    |                                                |
| KCTD17_HOMSA     |                                                |
| LQSDRDETAYLID    |                                                |
| KCTD17_MUSMU     |                                                |
| LQSDRDETAYLID    |                                                |
| U3JA92_DANRE     |                                                |
| LHSDTDETAYVID    |                                                |
| Q18776_CAEL      |                                                |
| LPTDRDETAYLID    |                                                |
| Q9W579_DROME     |                                                |

|                |                                                 |
|----------------|-------------------------------------------------|
| LISDRDETGAYLID |                                                 |
| KCTD9_HOMSA    | HTDWLTLNVGGRYFTTTRSTLVNKEPDSMLAHMFKDKGVW-----   |
| GNKQDHRGAFLID  |                                                 |
| KCTD9_MUSMU    | HTDWLTLNVGGRYFTTTRSTLVNKEPDSMLAHMFKDKGVW-----   |
| GNKQDHRGAFLID  |                                                 |
| F1Q5M1_DANRE   | HTDWLTLNIGGRLFTTTRSTLVSKEPDSMLAHMFREKDVW-----   |
| GNKQDERGAFLID  |                                                 |
| Q6DGD4_DANRE   | HTDWITLNVGGRRFTTTRSTLV-KETESMLAHMFRDKDVW-----   |
| GNKQDEQGAYLID  |                                                 |
| Q8T0F7_DROME   | PNRWVKLNVGGQIYATTIDTLVGREPDSMLARMFLQNGSMK-----  |
| PSEERDEQGAYLID |                                                 |
| KCTD3_HOMSA    | SGEIVQLNVGGTRFSTSRQTLM-WIPDSFFSLLSGRISTL-----   |
| RDETGAIFID     |                                                 |
| KCTD3_MUSMU    | SGEIVQLNVGGTRFSTSRQTLM-WIPDSFFSLLSGRISTL-----   |
| RDETGAIFID     |                                                 |
| F1Q6W0_DANRE   | MGDIIQLNVGGTRFSTSRQTLT-WIPDSFFSLLSGRISTL-----   |
| RDETGAIFID     |                                                 |
| SHKB1_HOMSA    | PGEVIHLNVGGKRFSTSRQTLT-WIPDSFFSLLSGRISTL-----   |
| KDETGAIFID     |                                                 |
| SHKB1_MUSMU    | PGEVIHLNVGGKRFSTSRQTLT-WIPDSFFSLLSGRISTL-----   |
| KDETGAIFID     |                                                 |
| E7FFI2_DANRE   | IGDIIHLNVGGKRFSTSRQTLT-WVPDSFFSLLSGRISTL-----   |
| KDETGAIFID     |                                                 |
| Q9VH62_DROME   | SSDLVNLNVGGQRFSTSRQTLT-WIPDTFFTALLSGRISSL-----  |
| RDEHNAIFID     |                                                 |
| 017001_CAEL    | SDYIVNLNVGGGRIFATSCNTLT-WIPDSFFTSLLSGRMNSV----- |
| KDPSGAIFID     |                                                 |
| Q9TZA6_CAEL    | SETIVKLVGGSVFETWKSTLT-K-QDGFFKTLVETNIPVK-----   |
| KDTSDCYFID     |                                                 |
| Q18986_CAEL    | PSTIVKLDVGGKIFKTTIFTLT-K-HDSMLKTMFCTDVPVT-----  |
| KNEEGSVFID     |                                                 |
| Q7JZ62_DROME   | SSQYLKLVGGHLYYTTIGTLT-KNNDTMLSAMFSGRMEVL-----   |
| TDSEGWILID     |                                                 |
| KCTD10_HOMSA   | SSKYVKLVGGALYYTTMQTLT-K-QDTMLKAMFSGRMEVL-----   |
| TDSEGWILID     |                                                 |
| KCTD10_MUSMU   | SSKYVKLVGGALYYTTMQTLT-K-QDTMLKAMFSGRMEVL-----   |
| TDSEGWILID     |                                                 |
| Q6P7X5_DANRE   | SSKYVKLVGGALYYTTMQTLT-K-QDTMLKAMFSGRMEVL-----   |
| TDSEGWILID     |                                                 |
| TNFAIP1_HOMSA  | GNKYVQLNVGGSLYYTTVRALT-R-HDTMLKAMFSGRMEVL-----  |
| TDKEGWILID     |                                                 |
| TNFAIP1_MUSMU  | GNKYVQLNVGGSLYYTTVRALT-R-HDTMLKAMFSGRMEVL-----  |
| TDKEGWILID     |                                                 |
| F1R5K5_DANRE   | GNKYVQLNVGGNLYYSTLQVLT-R-QDTLLRSMFSGKMEVL-----  |
| TDKEGWILID     |                                                 |
| KCTD13_HOMSA   | NSKYVKLVGGSLHYTTLRTLT-G-QDTMLKAMFSGRVEVL-----   |
| TDAGGWVLID     |                                                 |
| KCTD13_MUSMU   | NSKYVKLVGGSLHYTTLRTLT-G-QDTMLKAMFSGRVEVL-----   |
| TDAGGWVLID     |                                                 |
| A9ULR9_DANRE   | SSKYVKLVGGTLHYTTVQTLT-K-EDSLLRSICDGSTEVS-----   |

IDSEGWVLD  
 KCTD18\_HOMSA VLDVLRNLNVGGCIYTARRESLC-RFKDSMLASMFSGRFPLK-----  
 TDESGACVID  
 KCTD18\_MUSMU VLDILRLNVGGCIYTARRESLC-RFKDSMLASMFSGRFPLK-----  
 TDESGACIIN  
 KCTD19\_HOMSA PQQIIKVYVGSHWYATTLQTLL-KYPELLSNP---QRYW-----  
 ITYGQTLIIH  
 KCTD19\_MUSMU PQQIIKLYVGSHWYATTLQTLM-KYPELLSNT---QRYW-----  
 IAYGQTLIIH  
 A4IG48\_DANRE TAERVTLIVDNTRFVVDPSIFT-AQPNTMLGRMFGSGR-----  
 EHNFRPNEKGEYEVA  
 X1WDG9\_DANRE TSEKVTLLIVDNTRFVVDPSIFT-AQPNTMLGRMFGSGR-----  
 EHNFRPNEKGEYEVA  
 BTBDA\_MUSMU TSERVTLIVDNTRFVVDPSIFT-AQPNTMLGRMFGSGR-----  
 EHNFRPNEKGEYEVA  
 BTBDA\_HOMSA TSERVTLIVDNTRFVVDPSIFT-AQPNTMLGRMFGSGR-----  
 EHNFRPNEKGEYEVA  
 KCTD20\_HOMSA APEKVTLVLDGTRFVNPQIFT-AHPDTMLGRMFGPGR-----  
 EYNFRPNEKGEYEIA  
 KCTD20\_MUSMU APEKVTLVLDGTRFVNPQIFT-AHPDTMLGRMFGPGR-----  
 EYNFRPNEKGEYVIA  
 A0A2R8QE47\_DANRE SHDRVTLVVDGTHFVVDPAVFT-AYPDTVLGRMFGRAR-----  
 QHSFTRPNTKGEYEIA  
 X2J8G3\_DROME PPERITMLVDGVRFTVEQSLLT-AHPTTMLGTMFGSGF-----  
 QFAHTNERGEYDVA  
 Q21748\_CAEEL EGDKVCLLVQTRFLVSQRLLT-SKPDTMLGRMFSMRASCGLG-  
 ADLVSPNERDEFEVA  
 WHI2\_SACCE GDSLIIHLNIQENHYFITRDQLM-  
 SLPESLLLCLFPGVFLDRCGQVITNLTRDDEVYIVN  
 WHI2\_CANAL YNSIIHLNIRGKEFTITRDDLM-  
 SLPESILLCLFPNGVFLDVNGNVINNLTEDDIVY-VN  
 WHI2\_SACPO DPIIIQLCDRDTVFEFSRDQLL-  
 GLPESILMCLFPRGLLLDYEIQECQLTQRPLIFQTAD

KCTD1\_HOMSA R--DGQMFYIILNFLRTS-  
 KLLI-----  
 KCTD1\_MUSMU R--DGQMFYIILNFLRTS-  
 KLLI-----  
 Q5SNS9\_DANRE R--DGHMFRYIILNFLRTS-  
 KLLI-----  
 KCTD15\_HOMSA R--DGEIFRYVLSFLRTS-  
 KLLL-----  
 KCTD15\_MUSMU R--DGEIFRYILSFLRTS-  
 KLLL-----  
 Q6DC02\_DANRE R--DGEIFRYILSFLRTC-  
 KLLL-----  
 Q9W2F9\_DROME R--DGGMFRHILNFMRNS-  
 RLLI-----  
 KCTD6\_HOMSA R--DGPLFRYVLNFLRTS-

|               |                     |
|---------------|---------------------|
| ELTL          | -----               |
| KCTD6_MUSMU   | R--DGPLFRYVLNFLRTS- |
| ELTL          | -----               |
| Q6DG99_DANRE  | R--DGTLFRYILNFLRTS- |
| ELTL          | -----               |
| KCTD21_HOMSA  | R--DGKVFYILNFLRTS-  |
| HLDL          | -----               |
| KCTD21_MUSMU  | R--DGKVFYILNFLRTS-  |
| HLDL          | -----               |
| KCTD11_HOMSA  | R--DGKAFRHILNFLRLG- |
| RLDL          | -----               |
| KCTD11_MUSMU  | R--DGKAFRHILNFLRLG- |
| RLDL          | -----               |
| KCTD4_HOMSA   | R--DGLLFRHVLNFLRNG- |
| ELLL          | -----               |
| KCTD4_MUSMU   | R--DGLLFRHVLNFLRNG- |
| ELLL          | -----               |
| Q6GMI6_DANRE  | R--DGPIFRHILNFLRLG- |
| ELVL          | -----               |
| KCTD8_HOMSA   | R--DGFLFRYVLDYLRDK- |
| QLAL          | -----               |
| KCTD8_MUSMU   | R--DGFLFRYVLDYLRDK- |
| QLAL          | -----               |
| Q3L1G3_DANRE  | R--DGFLFRYVLDFLRDR- |
| QLVL          | -----               |
| KCTD16_HOMSA  | R--DGFLFRYILDYLRDR- |
| QVVL          | -----               |
| KCTD16_MUSMU  | R--DGFLFRYILDYLRDR- |
| QVVL          | -----               |
| Q3L1G4_DANRE  | R--DGFLFRYVLDYLRDK- |
| QVVL          | -----               |
| Q3L1G6_DANRE  | R--DGFLFRYVLDYLRDK- |
| TVVL          | -----               |
| Q804Q4_DANRE  | R--DGFLFRYILDYLRDL- |
| NLVL          | -----               |
| Q561T3_DANRE  | R--DGFLFRYILDYLRDQ- |
| TLVL          | -----               |
| KCNRG_MUSMU   | R--DGALFSFILDFLRNH- |
| ELLL          | -----               |
| KCNRG_HOMSA   | R--DGDLSFILDFLRTH-  |
| QLLL          | -----               |
| KCTD12_HOMSA  | R--DGFLFRYILDYLRDL- |
| QLVL          | -----               |
| KCTD12_MUSMU  | R--DGFFFRYILDYLRDL- |
| QLVL          | -----               |
| Q9VDH3_DROME  | R--DGVLFYILDYLRDK-  |
| ALHL          | -----               |
| A0PD34_CAEEEL | R--DGPLFAYVLHFLRTD- |
| KLSL          | -----               |
| KCTD7_HOMSA   | R--DGTHFGDVLNFLRSG- |

|                  |                       |
|------------------|-----------------------|
| DLPP-----        |                       |
| KCTD7_MUSMU      | R--DGTHFGDVLNFLRSG-   |
| DLPP-----        |                       |
| Q0V7V7_DANRE     | R--DGTYFGDILNFLREG-   |
| ELPQ-----        |                       |
| KCTD14_HOMSA     | R--PSTYFRPILDYLRTG-   |
| QVPT-----        |                       |
| KCTD14_MUSMU     | R--PGTYFGLLLDYLRTG-   |
| QVPT-----        |                       |
| A0A2R8RRJ7_DANRE | R--DGTLFTHILEYLRTE-   |
| KLPC-----        |                       |
| KCTD2_HOMSA      | R--DPTYFGPILNYLRHG-   |
| KLII-----        |                       |
| Q0P490_DANRE     | R--DPTYFGPILNYLRHG-   |
| KLII-----        |                       |
| KCTD5_HOMSA      | R--DPTYFGPVLNYLRHG-   |
| KLVI-----        |                       |
| KCTD5_MUSMU      | R--DPTYFGPVLNYLRHG-   |
| KLVI-----        |                       |
| Q6NYY3_DANRE     | R--DPTYFGPVLNYLRHG-   |
| KLVL-----        |                       |
| KCTD2_MUSMU      | R--DPTYFGPILNYLRHG-   |
| KLII-----        |                       |
| KCTD17_HOMSA     | R--DPTYFGPILNFLRHG-   |
| KLVL-----        |                       |
| KCTD17_MUSMU     | R--DPTYFGPILNFLRHG-   |
| KLVL-----        |                       |
| U3JA92_DANRE     | R--DPTYFGPILNYLRHG-   |
| KLVI-----        |                       |
| Q18776_CAEEEL    | R--DPDFSPILNYLRHG-    |
| KLIM-----        |                       |
| Q9W579_DROME     | R--DPKYFAPVLNYLRHG-   |
| KLVL-----        |                       |
| KCTD9_HOMSA      | R--SPEYFEPILNYLRHG-   |
| QLIV-----        |                       |
| KCTD9_MUSMU      | R--SPEYFEPILNYLRHG-   |
| QLIV-----        |                       |
| F1Q5M1_DANRE     | R--SPEYFEPILNYLRHG-   |
| QIII-----        |                       |
| Q6DGD4_DANRE     | R--SPDYFEPILNYLRHG-   |
| QLII-----        |                       |
| Q8T0F7_DROME     | R--SPRYFEPINIINYLRHG- |
| QFVC-----        |                       |
| KCTD3_HOMSA      | R--DPAAFAPILNFLRTK-   |
| ELDL-----        |                       |
| KCTD3_MUSMU      | R--DPAAFAPILNFLRTK-   |
| ELDL-----        |                       |
| F1Q6W0_DANRE     | R--DPTAFAPILNFLRTK-   |
| ELDL-----        |                       |
| SHKB1_HOMSA      | R--DPTVFAPILNFLRTK-   |

|                      |                     |
|----------------------|---------------------|
| ELDP                 |                     |
| SHKB1_MUSMU          | R--DPTVFAPILNFLRTK- |
| ELDP                 |                     |
| E7FFI2_DANRE         | R--DPSLFAPILNFLRTK- |
| ELHP                 |                     |
| Q9VH62_DROME         | R--DPTLFSIILNYLRTK- |
| DIDI                 |                     |
| 017001_CAEEL         | R--DPDLFRVILNYLRTK- |
| QVDL                 |                     |
| Q9TZA6_CAEEL         | R--SPKYFETVLNYMRS-  |
| VTVL                 |                     |
| Q18986_CAEEL         | R--DSKHFRLILNFLRDG- |
| QIAL                 |                     |
| Q7JZ62_DROME         | R--CGNHFGIILNYLRDG- |
| TVPL                 |                     |
| KCTD10_HOMSA         | R--CGKHFGTILNYLRDG- |
| AVPL                 |                     |
| KCTD10_MUSMU         | R--CGKHFGTILNYLRDG- |
| GVPL                 |                     |
| Q6P7X5_DANRE         | R--CGKHFGTILNYLRDG- |
| VVPL                 |                     |
| TNFAIP1_HOMSA        | R--CGKHFGTILNYLRDD- |
| TITL                 |                     |
| TNFAIP1_MUSMU        | R--CGKHFGTILNYLRDD- |
| TITL                 |                     |
| F1R5K5_DANRE         | R--CGKHFGSILSYLRDG- |
| FVNL                 |                     |
| KCTD13_HOMSA         | R--SGRHFGTILNYLRDG- |
| SVPL                 |                     |
| KCTD13_MUSMU         | R--SGRHFGTILNYLRDG- |
| SVPL                 |                     |
| A9ULR9_DANRE         | R--CGRHFSLVLNFLRDG- |
| TVPL                 |                     |
| KCTD18_HOMSA         | R--                 |
| DGRLFKYLLDYLHGEVQIPT |                     |
| KCTD18_MUSMU         | R--                 |
| DGHLFKYILDYHGEVQTPS  |                     |
| KCTD19_HOMSA         | G--DGQMFRHILNFLRLG- |
| KLFL                 |                     |
| KCTD19_MUSMU         | G--DGQMFRHILNFLRLG- |
| KLFL                 |                     |
| A4IG48_DANRE         | EGISSTVFRAILDYYKSG- |
| IIRC                 |                     |
| X1WDG9_DANRE         | EGISSTVFRAILDYYKSG- |
| IIRC                 |                     |
| BTBDA_MUSMU          | EGIGSTVFRAILDYYKTG- |
| IIRC                 |                     |
| BTBDA_HOMSA          | EGIGSTVFRAILDYYKTG- |
| IIRC                 |                     |
| KCTD20_HOMSA         | EGISATVFRTVLDYYKTG- |

```

IINC-----
KCTD20_MUSMU      EGISATVFRVLDYYKTG-
IINC-----
A0A2R8QE47_DANRE EGIGASIFRIILDFYRVG-
ILHC-----
X2J8G3_DROME      DGISHLVFRAILEYYKSG-
VIRC-----
Q21748_CAEEL      DGMTSSCFRAILDYYQSG-
TMRC-----
WHI2_SACCE         F--PPDCFHEYIMEIYTKA-
HDDLYNHPVEKFFDRPSSSFVSNAGFFGLSSNNSISSNNE
WHI2_CANAL         F--DPQTFQYIINTFYQA-QQDLIQMSTNTTNTLTPV----
TSHNNGRHNNNNNSSRHNRQ
WHI2_SACPO         F--DPSLLQYILNYFQMA-
ENRTANDEI-----ALSP

```

```

KCTD1_HOMSA       ---PDDFKDYTLLEYEAKYFQLQPMLLEMER-WKQDRETGRF
KCTD1_MUSMU       ---PDDFKDYTLLEYEAKYFQLQPMLLEMER-WKQDRETGRF
Q5SNS9_DANRE      ---PDDFKDYSLLEYEARYFQLQPLQVELER-WRSEQDSRFT
KCTD15_HOMSA      ---PDDFKDFSLLYEARYYQLQPMVRELER-WQQEQEQRRR
KCTD15_MUSMU      ---PDDFKDFNLLYEARYYQLQPMVRELER-WQQDQEQRRR
Q6DC02_DANRE      ---PDDFKDFNLLYEARYYQLSPMIKELER-WKQEREQRRL
Q9W2F9_DROME      ---AEDFPDLELLLEARYYEVEPMIKQLES-MRKDRVRNGN
KCTD6_HOMSA       ---PLDFKEFDLLRKEADFYQIEPLIQCLND-PKPLYPMDTF
KCTD6_MUSMU       ---PLDFKEFDLLRKEADFYQIEPLIQCLND-PRPLYPMDTF
Q6DG99_DANRE      ---PVDFTELDLLRKEADFYQIEPLIQCLND-PKPLYPLDTF
KCTD21_HOMSA      ---PEDFQEMGLLRREADFYQVQPLIEALQE-KEVELSKAEK
KCTD21_MUSMU      ---PEDFQEMGLLRREADFYQVQPLIEALQE-KEVELSKAEK
KCTD11_HOMSA      ---PRGYGETALLRAEADFYQIRPLLDALRE-LEASQGTPAP
KCTD11_MUSMU      ---PRGYGETALLKAEADFYQIRPLLDALRE-LEASRGTPAS
KCTD4_HOMSA       ---PEGFRENQLLAQEAFFQLKGLAEVKSWEKEQLTPRE
KCTD4_MUSMU       ---PEGFRENQLLAQEAFFQLKGLAEVKSWEKEQLTPRE
Q6GMI6_DANRE      ---PEDFKETELLRREANFYRLSELAQALQD-WEQQQATQRE
KCTD8_HOMSA       ---PEHFPEKERLLREAIFYQLTDLVKLLSPKVTQNSLNDE
KCTD8_MUSMU       ---PEHFPEKERLLREAFFQLTDLVKLLSPKVTQNSLNDE
Q3L1G3_DANRE      ---PEHFPERERLQREAEHFQLGELLRLLGPRVAKQGS LNDE
KCTD16_HOMSA      ---PDHFPEKGRLKREAIFYQLPDLVKLLTPDEIKQS--PDE
KCTD16_MUSMU      ---PDHFPERGRLKREAIFYQLPDLVKLLAPEDVKQS--PDE
Q3L1G4_DANRE      ---PDHFPEKGRLKREAIFYQLPDLVKLLTPDDLKPS--SDE
Q3L1G6_DANRE      ---PDYFPEKGRLKREAFFQLPELVKILTPDDYSHS-DFDE
Q804Q4_DANRE      ---PDYFPEKSRLQREAEFFQLRDLSKLLSPKMSKDNSITDE
Q561T3_DANRE      ---PDYFKEKASLLKEAIFYQLQDLAKRLKPAVSKENSISEE
KCNRG_MUSMU       ---PSDFADHHRLLQREALFYELDSLVDLLSQFLLQSRSAVME
KCNRG_HOMSA       ---PTEFSDYLRLQREALFYELRSLVDLLNPYLLQPRPALVE
KCTD12_HOMSA      ---PDYFPERSRLQREAEYFELPELVRRLGAPQQPGPGPPPS
KCTD12_MUSMU      ---PDYFPERSRLQREAEYFELPELVRRLGAPQQPGPGPPPS
Q9VDH3_DROME      ---PEGFRERQRLRREAHEFKLTAMLECIRS---ERDARPPG
A0PD34_CAEEL      ---PEQFREVARLKDEADFYRLERFSTLLSN-ASSISPRPRT
KCTD7_HOMSA       ---RERVRA---VYKEAQYYAIGPLLEQLENMQPLKGEKVRQ

```



KCTD7\_MUSMU ---REHVRA---VHKEAQYYAIGPLLEQLENMQPLKGEKVRQ  
Q0V7V7\_DANRE ---RDRVRA---VHREAQYYAIGPLLENLEDTQPLTGEKVRQ  
KCTD14\_HOMSA -----QHIPE---VYREAQFYEIKPLVKLLEDMPQIFGEQVSR  
KCTD14\_MUSMU -----EYVPE---VYQEAQFYQIHLLVKILEDMPQIFGEQVAR  
A0A2R8RRJ7\_DANRE -----EHLQE---VHKEAIYYDIKPLVKAIEETPQFFGETVGR  
KCTD2\_HOMSA ----TKELAEEGVLEEAEFYNIASLVRLVKERIRDNENRTSQ  
Q0P490\_DANRE ----NKNLAEEGVLEEAEFYNIASLVRLVKERIRDNENRTSQ  
KCTD5\_HOMSA ----NKDLAEEGVLEEAEFYNIASLVRLVKERIRDNENRTSQ  
KCTD5\_MUSMU ----NKDLAEEGVLEEAEFYNIASLVRLVKERIRDNENRTSQ  
Q6NYY3\_DANRE ----NRGLAEEGVLEEAEFYNIASLVRLVKERIRDNENRTSQ  
KCTD2\_MUSMU ----TKELGEEGVLEEAEFYNIASLVRLVKERIRDNENRTSQ  
KCTD17\_HOMSA ----DKDMAEEGVLEEAEFYNIASLVRLVKERIRDNENRTSQ  
KCTD17\_MUSMU ----DKDMAEEGVLEEAEFYNIASLVRLVKERIRDNENRTSQ  
U3JA92\_DANRE ----NKELAEEGVLEEAEFYNIASLVRLVKERIRDNENRTSQ  
Q18776\_CAEEEL ----NPGLSEEGVLEEAEFYNIASLVRLVKERIRDNENRTSQ  
Q9W579\_DROME -----DGVSEEGVLEEAEFYNIASLVRLVKERIRDNENRTSQ  
KCTD9\_HOMSA ----NDGINLLGVLEEARFFGIDSLIEHLEVAIKNSQPPEDH  
KCTD9\_MUSMU ----NDGINLLGVLEEARFFGIDSLIEHLEVAIKNSQPPEDH  
F1Q5M1\_DANRE ----NDGINLLGVLEEARFFGIEQLAEQLEVAIKNSHPPEDH  
Q6DGD4\_DANRE ----NDGINLLGVLEEARFFGIERLAEQLEGVKNSQPPDDH  
Q8T0F7\_DROME ----DSNISVLGVLEEARFFGIFSLVTHLEERLQOQETPLGD  
KCTD3\_HOMSA -----RGVSINVLRHEAEFYGITPLVRRLLLCEELERSSCGS  
KCTD3\_MUSMU -----RGVSINVLRHEAEFYGITPLVRRLLLCEELERSSCGS  
F1Q6W0\_DANRE -----RGVNISILRHEAEFYGITPLVRRLLLCEELERSSCGS  
SHKB1\_HOMSA -----RGVHGSSLLHEAQFYGLTPLVRRLLQREELDRSSCGN  
SHKB1\_MUSMU -----RGVHGSSLLHEAQFYGLTPLVRRLLQREELDRSSCGN  
E7FFI2\_DANRE -----RSIDVHLLIHEAEFYGITPLVRRLLQREELDRSSCGN  
Q9VH62\_DROME -----KNCEIRALRHEAEFYGITPLTKRLALCEDLNHSSCGD  
017001\_CAEEEL -----CGIKVDTLKHEALFFGLTPLIRRLTLCEELSSTSCGS  
Q9TZA6\_CAEEEL ---PDSEKELQELKKEAEFYLLQLVDLCEPINNQIRT-YRS  
Q18986\_CAEEEL ---PDSREVREVLAEASYFLLDPLIELCGERLEQSLNPYYH  
Q7JZ62\_DROME ---PETNKEIAELLAEAKYYCITELAISERALYAHQ-EPKP  
KCTD10\_HOMSA ---PESRREIEELLAEAKYYLVQGLVEECQAALQN-KDITYEP  
KCTD10\_MUSMU ---PESRREIEELLAEAKYYLVQGLLEECQAALQN-KDITYEP  
Q6P7X5\_DANRE ---PESRRETEELLAEAKYYLVQGLVDECQAALQN-KDAYEP  
TNFAIP1\_HOMSA ---PQNRQEIQELMAEAKYYLIQGLVNMCSALQDKKDSYQP  
TNFAIP1\_MUSMU ---PQSRQEIQELMAEAKYYLIQGLVSTCQTALQDKKDSYQP  
F1R5K5\_DANRE ---PKSRQSIMELLAEAKYYLIQGLIDLQKELQDNKEKALC  
KCTD13\_HOMSA ---PESTRELGELLGEARYYLVQGLIEDCQLALQKRETLSP  
KCTD13\_MUSMU ---PESARELGELLGEARYYLVQGLIEDCQLALQKREKLSP  
A9ULR9\_DANRE ---PDSTRELEEVLEAEQYYRLQGLVQHCLSTLQKRRDVCRG  
KCTD18\_HOMSA ---DEQTRI--ALQEEADYFGIPYPYSLSDHLANE-METYSL  
KCTD18\_MUSMU ---DEQTRA--ALQEEADYFGIPYPYSLSDHLANE-METYSL  
KCTD19\_HOMSA ---PSEFKEWPLFCQEVVEEYHIPSLSEALAQCEAYKSWTQEK  
KCTD19\_MUSMU ---PSEFKEWPLFCQEVVEEYHIPALSEALAQCEAYKSWTQEK  
A4IG48\_DANRE ---PDGISIP-ELREACDYLCISFDYSTIK-CRDL SALLMHEL  
X1WDG9\_DANRE ---PDGISIP-ELREACDYLCISFEYSTIK-CRDL SALLMHEL  
BTBDA\_MUSMU ---PDGISIP-ELREACDYLCISFEYSTIK-CRDL SALLMHEL  
BTBDA\_HOMSA ---PDGISIP-ELREACDYLCISFEYSTIK-CRDL SALLMHEL  
KCTD20\_HOMSA ---PDGISIP-DLRDTCDYLCINFDFNTIR-CQDLSALLHEL

|                  |                                            |
|------------------|--------------------------------------------|
| KCTD20_MUSMU     | ---PDGISIP-DLRDTCDYLCINFDFTIR-CQDLSALLHEL  |
| A0A2R8QE47_DANRE | ---PEGVSLA-ELREACDYLCINFDYNTVR-CRDLSALLHEL |
| X2J8G3_DROME     | ---PPTVSVP-ELKEACDYLLIPFDATTVR-CQNLSL-LHEL |
| Q21748_CAEEL     | ---PSSVSVS-ELREACDYLLVPFNAQTVK-CQNLHALLHEL |
| WHI2_SACCE       | QDILHQPAAIIVLREDLDYYCVPQEEFQFDSTNEENNEDLLR |
| WHI2_CANAL       | ENILETKPAIIVLREDLDFYVIPPFERLNS---EQMKQLKLG |
| WHI2_SACPO       | PPSFPGKCGIILLKEDIEFFILPPISTTNTIAIEVSPNDLLK |
